# Supplementary material for: Y-chromosomal analysis of Greek Cypriots reveals a primarily common pre-Ottoman paternal ancestry with Turkish Cypriots
Source: PLoS One. 2017 Jun 16;12(6):e0179474. doi: 10.1371/journal.pone.0179474 (PMC5473566; doi:10.1371/journal.pone.0179474)
Supplement: S10 Table — (XLSX) [file pone.0179474.s017.xlsx]

## Sheet: shared ht % otherpop (Arlequin)
S10 Table. Shared haplotypes between Cypriots and other Western Eurasian and North African populations
Shared haplotypes (absolute numbers)
Haplotype dataset:	Cyprus [Greek Cypriots] current study	Cyprus [Turkish Cypriots]	Cyprus [Greek Cypriots] Voskarides et al	Cyprus [Greek Cypriots] combined samples	Greece [Greek]	Northern Greece Greece [Greek]	Greece [Greek] combined	Eskikoy Central Anatolia Turkey [Turkish]	Turkey [Turkish]	Turkey [Turkish] combined	Gocmen Central Anatolia Turkey [Afsar]	Merkez Central + Dogu Central Anatolia Turkey [Kurdish]	Aragon Spain [Spanish]	Asturias Spain [Spanish]	Baranya, Hungary [Romani]	Barcelona Spain [Spanish]	Basel, Switzerland [Swiss]	Basque Country Spain [Spanish/Basque]	Benetutti Sardinia Italy [Italian]	Berlin, Germany [German]	Bialystok, Poland [Polish]	Blekinge, Sweden [Swedish]	Bohemia, Czechia [Czech]	Bosnia and Herzegovina [Bosnian]	Brescia Italy [Italian]	Budapest, Hungary [Hungarian]	Bulgaria [Bulgarian]	Calabria Italy [Italian]	Carloforte Sardinia Italy [Italian]	Casablanca Morocco [Moroccan]	Catania + Trapani + Sicily Italy [Italian]	Central Campania Italy [Italian]	Central England [English]	Central Liguria + Liguria Italy [Italian]	Central Marche + Marche Italy [Italian]	Central Poland, Poland [Polish]	Central Portugal Portugal [Portuguese]	Central SardiniaItaly [Italian]	Copenhagen, Denmark [Danish]	Croatia [Croatian]	Desulo Sardinia Italy [Italian]	East Friuli Venezia-Giulia Udine Italy [Italian]	Egypt [Egyptian]	Estonia [Estonian]	Finland [Finnish]	Freiburg, Germany [German]	Friesland, Netherlands [Dutch]	Galicia Spain [Spanish]	Gdansk, Poland [Polish]
Sample size	344	378	519	860	214	191	405	30	218	248	30	80	200	256	53	78	643	197	48	131	150	41	72	100	124	100	195	30	41	166	214	31	81	91	138	102	83	44	185	125	50	47	91	125	254	260	95	46	170
Cyprus [Greek Cypriots] current study	344	27	110	454	1	1	2	0	0	0	0	0	1	0	1	0	1	0	0	0	0	0	0	0	0	1	2	0	0	0	0	0	0	0	1	0	0	0	0	0	0	0	0	0	0	0	0	0	1
Cyprus [Turkish Cypriots]	27	378	35	62	1	1	2	2	0	2	0	0	0	1	0	0	1	0	0	0	0	0	0	0	0	0	1	0	0	2	0	0	0	0	0	0	0	0	0	0	0	0	1	0	0	0	0	0	0
Cyprus [Greek Cypriots] Voskarides et al	86	30	519	602	2	2	4	0	0	0	0	0	0	0	0	0	0	0	0	1	1	0	0	2	0	1	1	0	0	0	0	0	0	0	0	0	0	0	1	0	0	0	0	2	0	1	0	0	5
Cyprus [Greek Cypriots] combined samples	344	42	519	860	3	2	5	0	0	0	0	0	1	0	1	0	1	0	0	1	1	0	0	2	0	2	3	0	0	0	0	0	0	0	1	0	0	0	1	0	0	0	0	2	0	1	0	0	6
Greece [Greek]	1	1	4	5	214	3	217	0	0	0	0	0	0	0	0	0	2	0	0	0	1	0	1	3	0	0	3	0	0	0	0	0	0	0	0	0	0	0	0	0	0	0	0	0	0	0	0	0	1
Northern Greece Greece [Greek]	2	1	4	6	3	191	194	0	0	0	0	0	0	0	0	0	0	0	0	1	0	0	0	3	0	0	4	0	0	0	0	0	0	0	1	1	0	0	0	1	0	0	0	0	2	0	0	0	0
Eskikoy Central Anatolia Turkey [Turkish]	0	1	0	0	0	0	0	30	0	30	0	0	0	0	0	0	0	0	0	0	0	0	0	0	0	0	0	0	0	0	0	0	0	0	0	0	0	0	0	0	0	0	0	0	0	0	0	0	0
Turkey [Turkish]	0	0	0	0	0	0	0	0	218	218	0	2	0	0	0	0	0	0	0	0	0	0	0	0	0	0	1	0	0	0	0	0	0	0	0	0	0	0	0	1	0	0	0	0	0	0	0	0	0
Shared haplotypes (% of other population)
Haplotype dataset:	Cyprus [Greek Cypriots] current study	Cyprus [Turkish Cypriots]	Cyprus [Greek Cypriots] Voskarides et al	Cyprus [Greek Cypriots] combined samples	Greece [Greek]	Northern Greece Greece [Greek]	Greece [Greek] combined	Eskikoy Central Anatolia Turkey [Turkish]	Turkey [Turkish]	Turkey [Turkish] combined	Gocmen Central Anatolia Turkey [Afsar]	Merkez Central + Dogu Central Anatolia Turkey [Kurdish]	Aragon Spain [Spanish]	Asturias Spain [Spanish]	Baranya, Hungary [Romani]	Barcelona Spain [Spanish]	Basel, Switzerland [Swiss]	Basque Country Spain [Spanish/Basque]	Benetutti Sardinia Italy [Italian]	Berlin, Germany [German]	Bialystok, Poland [Polish]	Blekinge, Sweden [Swedish]	Bohemia, Czechia [Czech]	Bosnia and Herzegovina [Bosnian]	Brescia Italy [Italian]	Budapest, Hungary [Hungarian]	Bulgaria [Bulgarian]	Calabria Italy [Italian]	Carloforte Sardinia Italy [Italian]	Casablanca Morocco [Moroccan]	Catania + Trapani + Sicily Italy [Italian]	Central Campania Italy [Italian]	Central England [English]	Central Liguria + Liguria Italy [Italian]	Central Marche + Marche Italy [Italian]	Central Poland, Poland [Polish]	Central Portugal Portugal [Portuguese]	Central SardiniaItaly [Italian]	Copenhagen, Denmark [Danish]	Croatia [Croatian]	Desulo Sardinia Italy [Italian]	East Friuli Venezia-Giulia Udine Italy [Italian]	Egypt [Egyptian]	Estonia [Estonian]	Finland [Finnish]	Freiburg, Germany [German]	Friesland, Netherlands [Dutch]	Galicia Spain [Spanish]	Gdansk, Poland [Polish]
Sample size	344	378	519	860	214	191	405	30	218	248	30	80	200	256	53	78	643	197	48	131	150	41	72	100	124	100	195	30	41	166	214	31	81	91	138	102	83	44	185	125	50	47	91	125	254	260	95	46	170
Cyprus [Greek Cypriots] current study	100	7.14286	21.1946	52.7907	0.46729	0.52356	0.493827	0	0	0	0	0	0.5	0	1.88679	0	0.155521	0	0	0	0	0	0	0	0	1	1.02564	0	0	0	0	0	0	0	0.724638	0	0	0	0	0	0	0	0	0	0	0	0	0	0.588235
Cyprus [Turkish Cypriots]	7.84884	100	6.74374	7.2093	0.46729	0.52356	0.493827	6.66667	0	0.806452	0	0	0	0.390625	0	0	0.155521	0	0	0	0	0	0	0	0	0	0.512821	0	0	1.20482	0	0	0	0	0	0	0	0	0	0	0	0	1.0989	0	0	0	0	0	0
Cyprus [Greek Cypriots] Voskarides et al	25	7.93651	100	70	0.934579	1.04712	0.987654	0	0	0	0	0	0	0	0	0	0	0	0	0.763359	0.666667	0	0	2	0	1	0.512821	0	0	0	0	0	0	0	0	0	0	0	0.540541	0	0	0	0	1.6	0	0.384615	0	0	2.94118
Cyprus [Greek Cypriots] combined samples	100	11.1111	100	100	1.40187	1.04712	1.23457	0	0	0	0	0	0.5	0	1.88679	0	0.155521	0	0	0.763359	0.666667	0	0	2	0	2	1.53846	0	0	0	0	0	0	0	0.724638	0	0	0	0.540541	0	0	0	0	1.6	0	0.384615	0	0	3.52941
Greece [Greek]	0.290698	0.26455	0.770713	0.581395	100	1.57068	53.5802	0	0	0	0	0	0	0	0	0	0.311042	0	0	0	0.666667	0	1.38889	3	0	0	1.53846	0	0	0	0	0	0	0	0	0	0	0	0	0	0	0	0	0	0	0	0	0	0.588235
Northern Greece Greece [Greek]	0.581395	0.26455	0.770713	0.697674	1.40187	100	47.9012	0	0	0	0	0	0	0	0	0	0	0	0	0.763359	0	0	0	3	0	0	2.05128	0	0	0	0	0	0	0	0.724638	0.980392	0	0	0	0.8	0	0	0	0	0.787402	0	0	0	0
Eskikoy Central Anatolia Turkey [Turkish]	0	0.26455	0	0	0	0	0	100	0	12.0968	0	0	0	0	0	0	0	0	0	0	0	0	0	0	0	0	0	0	0	0	0	0	0	0	0	0	0	0	0	0	0	0	0	0	0	0	0	0	0
Turkey [Turkish]	0	0	0	0	0	0	0	0	100	87.9032	0	2.5	0	0	0	0	0	0	0	0	0	0	0	0	0	0	0.512821	0	0	0	0	0	0	0	0	0	0	0	0	0.8	0	0	0	0	0	0	0	0	0
[truncated: 54 more columns]

## Sheet: shared ht % Cy (YHRD)
Population Sample	Total n (Yfiler)	Shared haplotypes with GCy (n)	Shared haplotypes with TCy (n)		Shared haplotypes (% of GCy)	Shared haplotypes (% of TCy)
Greek Cypriots	344	n/a	27
TOTAL GREEK CYPRIOTS	344	n/a	27		n/a	0.0710526
Turkish Cypriots	380	27	n/a
TOTAL TURKISH CYPRIOTS	380	27	n/a		0.0784884	n/a
Athens, Greece [Greek]	148	2	1
Total Central Greece_Attica	176	3	2		0.00872093	0.00526316
Northern Greece, Greece [Greek]	191	2	1
Total Macedonia	218	2	1		0.00581395	0.00263158
Total Thrace	27	0	0		0	0
Total Thessaly	27	0	0		0	0
Total Peloponnese	27	0	0		0	0
Total Crete	27	0	0		0	0
Total Asia Minor Aegean islands	27	0	0		0	0
Greece [Greek] - divided to all regions equally (n=27 to all, n=28 to Atttica-Central)	199	1	1*
TOTAL GREECE	538	5	3		0.0145349	0.00789474
Central Anatolia, Turkey + Eskikoy, Central Anatolia, Turkey [Turkish]	51	0	2
Total Central Anatolia	115	0	2		0	0.00526316
Çukurova, Turkey [Turk]	249	0	2
Mediterranean Region, Turkey [Turkish]	28	0	0
Total South Anatolia	340	0	2		0	0.00526316
Southeastern Anatolia, Turkey [Turkish]	150	0	3
East Anatolia [Turkish]	37	0	0
Total East Anatolia	251	0	3		0	0.00789474
Marmara Region, Turkey [Turkish]	385	0	4
Aegean Region, Turkey [Turkish]	27	0	0
Total West Anatolia	476	0	4		0	0.0105263
Black Sea Region [Turkish]	103	0	0
Total North Anatolia	167	0	0		0	0
Turkey [Turkish] - divided to all regions equally (n=64 to all)	320	0	0
TOTAL TURKEY	1350	0	11		0	0.0289474
Piedmont, Italy [Italian]	203	2	0
Total North Italy (Piedmont, Brescia, Modena, Lombardy, Ravenna, Verona, Udine, La Spezia, Bergamo)	1642	2	0		0.00581395	0
Offida, Italy [Italian]	38	1	1
Total Central Italy (Offida, Latium, Marche, Tuscany, Csentino)	420	1	1		0.00290698	0.00263158
Total South Italy (Calabria, Puglia, Campania, Sicily)	366	0	0		0	0
Total Sardinia	459	0	0		0	0
Italy [Italian] - divided to all regions equally (n=30 to all, n=32 to North Italy)	152	0	0
TOTAL ITALY	2887	3	1		0.00872093	0.00263158
Albania [Albanian]	412	5	1
TOTAL ALBANIA	412	5	1		0.0145349	0.00263158
Croatia [Croatian]	1339	2	2
TOTAL CROATIA	1339	2	2		0.00581395	0.00526316
Beirut, Lebanon [Lebanese]	555	4	5
TOTAL LEBANON	555	4	5		0.0116279	0.0131579
Iraq [Iraqi]	124	0	0
TOTAL IRAQ	124	0	0		0	0
Egypt [Egyptian]	208	0	1
TOTAL EGYPT	208	0	1		0	0.00263158
Libya [Libyan/Arab]	413	0	4
TOTAL LIBYA	413	0	4		0	0.0105263
Sousse, Tunisia [Tunisian]	218	0	1
TOTAL TUNISIA	218	0	1		0	0.00263158
Casablanca, Morocco [Arab]	166	0	2
TOTAL MOROCCO	166	0	2		0	0.00526316
*Added to Central Greece and Attica sub-population
